# Supplementary material
Source: publisher site journal article supplement (https://www.spandidos-publications.com/6804/downloadSupplementary)
Supplement: Supplementary file 1 [file downloadSupplementary]

## Sheet: Sheet1
Table SXI. GO annotation analysis of molecular function for targets of upregulated piwi-interacting RNAs.
Term	Overlap	P-value	Adjusted P-value	Odds Ratio	Combined Score	Genes
Amino Acid:Proton Symporter Activity (GO:0005280)	45413	0.00249771	0.0199593	555.167	3326.77	SLC36A3
L-proline Transmembrane Transporter Activity (GO:0015193)	45474	0.00349522	0.0199593	370.074	2093.27	SLC36A3
L-alanine Transmembrane Transporter Activity (GO:0015180)	45505	0.00399365	0.0199593	317.19	1751.86	SLC36A3
Glycine Transmembrane Transporter Activity (GO:0015187)	45536	0.00449184	0.0199593	277.528	1500.17	SLC36A3
Amino Acid:Monoatomic Cation Symporter Activity (GO:0005416)	45536	0.00449184	0.0199593	277.528	1500.17	SLC36A3
acyl-CoA Dehydrogenase Activity (GO:0003995)	45566	0.00498982	0.0199593	246.679	1307.49	GCDH
Diacylglycerol Kinase Activity (GO:0004143)	45566	0.00498982	0.0199593	246.679	1307.49	DGKG
fatty-acyl-CoA Binding (GO:0000062)	41275	0.0064824	0.0217139	184.981	932.06	GCDH
Alanine Transmembrane Transporter Activity (GO:0022858)	41640	0.00697947	0.0217139	170.744	847.705	SLC36A3
Solute:Proton Symporter Activity (GO:0015295)	43831	0.00995725	0.026607	116.789	538.336	SLC36A3
Lipid Kinase Activity (GO:0001727)	44197	0.0104528	0.026607	110.944	506.005	DGKG
mRNA 5'-UTR Binding (GO:0048027)	45292	0.011938	0.0278553	96.4589	427.123	RPL41
Monoatomic Cation Transmembrane Transporter Activity (GO:0008324)	13516	0.0183507	0.0355535	61.5864	246.228	PIEZO1
Monoatomic Ion Channel Activity (GO:0005216)	13516	0.0183507	0.0355535	61.5864	246.228	PIEZO1
Monoatomic Ion Gated Channel Activity (GO:0022839)	14611	0.0198252	0.0355535	56.8405	222.86	PIEZO1
Neutral L-amino Acid Transmembrane Transporter Activity (GO:0015175)	14977	0.0203163	0.0355535	55.4167	215.922	SLC36A3
Flavin Adenine Dinucleotide Binding (GO:0050660)	20090	0.027168	0.0447473	41.0206	147.908	GCDH
L-amino Acid Transmembrane Transporter Activity (GO:0015179)	23012	0.0310639	0.0483217	35.7133	123.986	SLC36A3
Phosphotransferase Activity, Alcohol Group As Acceptor (GO:0016773)	28126	0.037848	0.0557759	29.114	95.3245	DGKG
mRNA 3'-UTR Binding (GO:0003730)	33970	0.0455488	0.0637683	24.0314	74.2323	RPL41
Monoatomic Cation Channel Activity (GO:0005261)	1/105	0.0512879	0.0683839	21.2457	63.1062	PIEZO1
mRNA Binding (GO:0003729)	1/282	0.132409	0.168521	7.7932	15.7567	RPL41
Ubiquitin Protein Ligase Activity (GO:0061630)	1/311	0.145088	0.173316	7.05376	13.6167	TRIM26
Ubiquitin-Like Protein Ligase Activity (GO:0061659)	1/319	0.148556	0.173316	6.87352	13.1064	TRIM26
Ubiquitin-Protein Transferase Activity (GO:0004842)	1/412	0.187954	0.210508	5.29305	8.84765	TRIM26
Metal Ion Binding (GO:0046872)	1/521	0.232036	0.249885	4.16026	6.07756	TRIM26
DNA Binding (GO:0003677)	1/846	0.350989	0.363989	2.51742	2.63574	TRIM26
RNA Binding (GO:0003723)	1/1411	0.518954	0.518954	1.46414	0.960392	RPL41
